# Supplementary material for: Analysis of allelic cross-reactivity of monoclonal IgG antibodies by a multiplexed reverse FluoroSpot assay
Source: eLife. 2022 Jul 15;11:e79245. doi: 10.7554/eLife.79245 (PMC9286747; doi:10.7554/eLife.79245)
Supplement: Supplementary file 1. [file elife-79245-supp1.xlsx]

## Sheet: Sheet1
	Name	Template	Primer name	Primer sequence
1	IT4 ID1-ID2	pcDNA3.4 codon optimized FL	IT4VAR04 ID1-ID2 F	GCCTTAAGAACTACATCAAGGGCGACC
			IT4VAR04 ID1-ID2 R	ATACTCGAGGTCCAGCTTGCTGGAGTTG
2	IT4 DBL3X	pcDNA3.4 codon optimized FL	IT4VAR04 DBL3X F	GCCTTAAGTGCGACCTGAACGCCAC
			IT4VAR04 DBL3X R	ATACTCGAGGCAGCTGCAGATGCTGCTG
4	IT4 DBL5e	pcDNA3.4 codon optimized FL	IT4VAR04 DBL5e F	GCCTTAAGCCCCTGGACAGATGCTTCG
			IT4VAR04 DBL5e R	ATACTCGAGGCAGGGGCACTTGCTGC
5	NF54 ID1-ID2	pIRES2-AcGFP codon optimized FL	NF54 ID1-ID2 F	GCCTTAAGAACTACATCAAGGGCGACCCT
			NF54 ID1-ID2 R	ATACTCGAGGTCCAGCTTGGAGCTGTTGG
8	NF54 DBL3X	pIRES2-AcGFP codon optimized FL	NF54 DBL3x F	GCCTTAAGTGCTCCGAGCCAATCTATATCA
			NF54 DBL3x R	ATACTCGAGGCAGCTACAGATAGAGGAATAATCG
9	NF54 DBL5e	pIRES2-AcGFP codon optimized FL	NF54 DBL5e F	GCCTTAAGCCCCTGGACAGGTGTTTTGAC
			NF54 DBL5e R	ATACTCGAGGCATGGACACTTGCTGCAGT
6	M920 ID1-ID2	pIRES2-AcGFP codon optimized FL	M920 ID1-ID2 F	GCCTTAAGAATTCTTATGTGAAGAACAATCCCTATT
			M920 ID1-ID2 R	ATACTCGAGGTCCAGCTTTGTGGAGTTGCT
10	M920 DBL3X	pIRES2-AcGFP codon optimized FL	M920 DBL3x F	GCCTTAAGTGTTCCGAGCCCATCTACATC
			M920 DBL3x R	ATACTCGAGACAGGAGCAGATGGAGCTGTAGT
11	M920 DBL5e	pIRES2-AcGFP codon optimized FL	M920 DBL5e F	GCCTTAAGCCCCTGGACCGCTGTTTT
			M920 DBL5e R	ATACTCGAGACATGGGCACTTGCTGCAG
7	Malay Camp ID1-ID2	pIRES3-Puro codon optimized FL	Malay camp ID1-ID2 F	GCCTTAAGGATTACATCAAGGGCGACCCT
			Malay camp ID1-ID2 R	ATACTCGAGGTCCAGCTTAGAGGAATTCAGCTT
12	Malay Camp DBL3X	pIRES3-Puro codon optimized FL	Malay Camp DBL3x F	GCCTTAAGCTGAACGCCACCAATTATATCC
			Malay Camp DBL3x R	ATACTCGAGACAGGAGCAGATGGAGCTATAGTC
13	Malay Camp DBL5e	pIRES3-Puro codon optimized FL	Malay Camp DBL5e F	GCCTTAAGCCTCTGGACCGCTGCTTTG
			Malay Camp DBL5e R	ATACTCGAGACATGGGCACTTGCTGCAGT
